# Supplementary material
Source: publisher figshare collection journal article supplement (https://gsajournals.figshare.com/ndownloader/files/22344774)
Supplement: Supplementary file 1 [file 22344774]

Figure S1


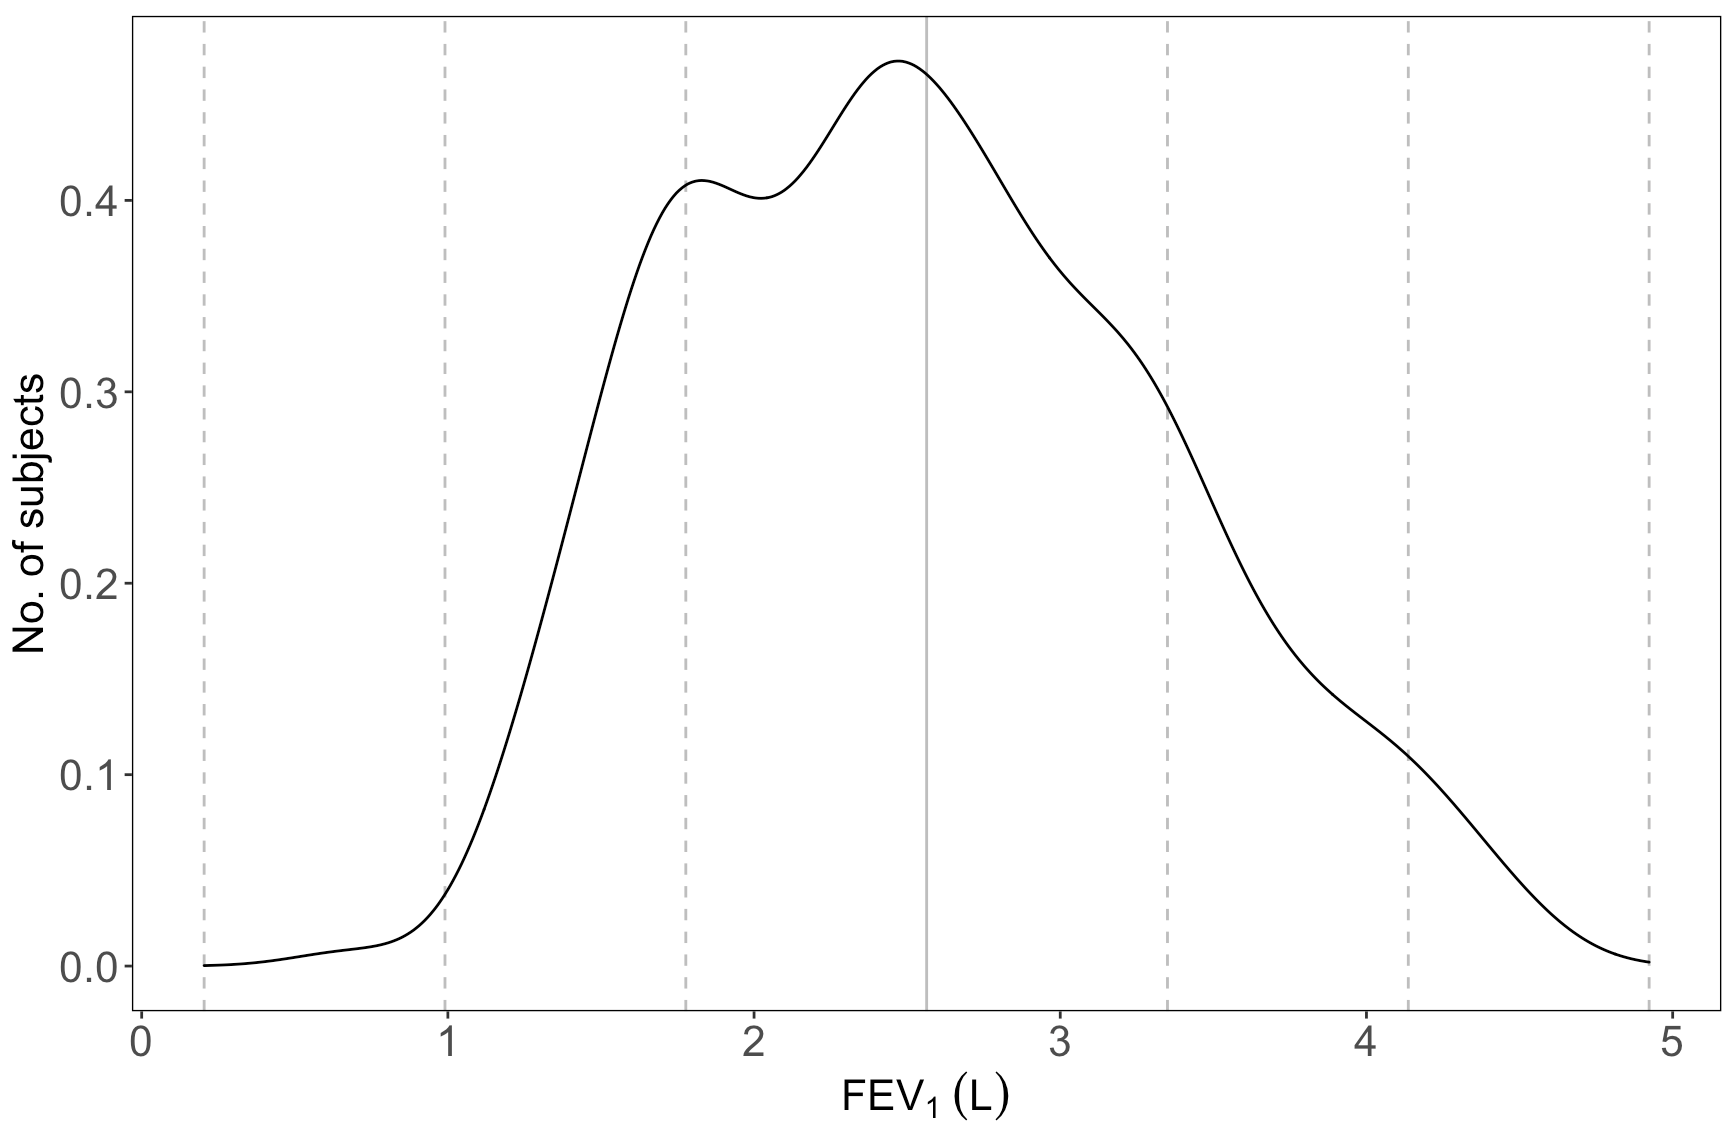


Figure S1. Density distribution of FEV1 in 867 African American children with asthma. The vertical solid line represents the mean of 2.56L and dashed lines away from the mean represents 1 to 3 standard deviations (0.79L), respectively.

Figure S2


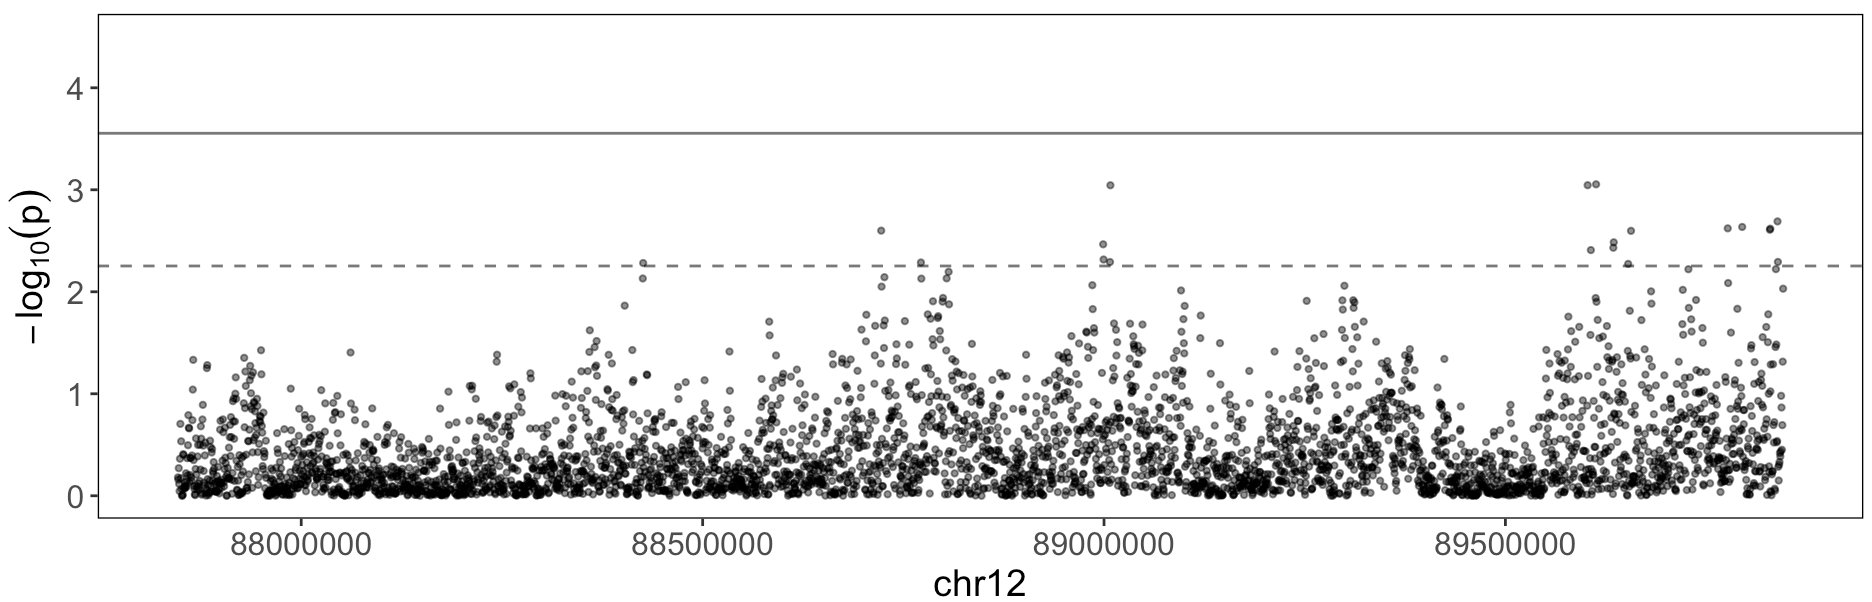


Figure S2. Region-based FEV1* association analysis using all common and rare variants in 1kb sliding windows. *FEV1.res.rnorm was used as the phenotype for the association analysis. Solid and dashed horizontal line indicates Bonferroni-adjusted statistical significance level of p = 2.80 x 10-4­ and suggestive significance level of p = 5.60 x 10-3.

Figure S3.


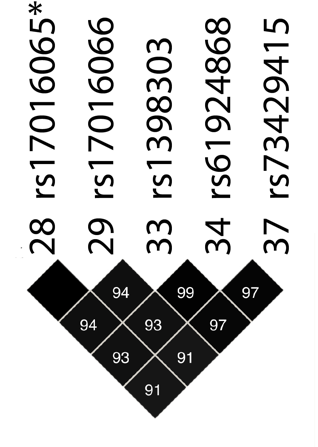

Figure S3. Five *KITLG* eQTLs are in high linkage disequilibrium. Numbers and different shades of black in the LD plot represent LD in R2. One of the independent signals identified in the conditional analysis is marked with *. Marker numbers (28, 29, 33, 34 and 37) correspond to those used in Figure 2.
